# Supplementary material for: Study on the Discrimination between Citri Reticulatae Pericarpium Varieties Based on HS-SPME-GC-MS Combined with Multivariate Statistical Analyses
Source: PubMed Central journal article supplement (PMC6099961; doi:10.3390/molecules23051235), 2018-05-22
Supplement: molecules-23-01235-s001.pdf [file molecules-23-01235-s001.pdf]

| No. | Compounds                                      | CAS number | Molecular formula                              | RT <sup>a</sup> (min) | LRI <sup>b</sup> | LRI <sup>c</sup> | Relative areas <sup>d</sup> |       |        |        |        |        |        |        |        |        |       |
|-----|------------------------------------------------|------------|------------------------------------------------|-----------------------|------------------|------------------|-----------------------------|-------|--------|--------|--------|--------|--------|--------|--------|--------|-------|
|     |                                                |            |                                                |                       |                  |                  | GCP                         | CP1   | CP2    | CP3    | CP4    | CP5    | CP6    | CP7    | CP8    | CP9    | CP10  |
| 19  | 4-Terpineol                                    | 562-74-3   | C <sub>10</sub> H <sub>18</sub> O              | 18.35                 | 1177             | 1179             | 2.687                       | 0.695 | 2.124  | 1.789  | 1.485  | 1.018  | 1.191  | 1.316  | 1.070  | 0.853  | 0.687 |
| 20  | p-Cymen-8-ol                                   | 1197-01-9  | C <sub>10</sub> H <sub>14</sub> O              | 18.49                 | 1181             | 1181             | 0.894                       | 0.115 | 0.357  | 0.353  | 0.319  | 0.114  | 0.201  | 0.268  | 0.336  | 0.090  | 0.239 |
| 21  | Cyclohexanol, 2-methylene-5-(1-methylethenyl)- | 35907-10-9 | C <sub>10</sub> H <sub>16</sub> O              | 18.64                 | 1186             | 1186             | 0.403                       | 0.070 | 0.147  | 0.159  | 0.217  | 0.067  | 0.115  | 0.064  | 0.141  | 0.030  | 0.045 |
| 22  | α-Terpineol                                    | 98-55-5    | C <sub>10</sub> H <sub>18</sub> O              | 18.72                 | 1189             | 1185             | 10.217                      | 4.107 | 10.065 | 7.359  | 7.328  | 6.237  | 7.127  | 6.828  | 5.854  | 5.530  | 3.921 |
| 23  | Decanal                                        | 112-31-2   | C <sub>10</sub> H <sub>20</sub> O              | 19.02                 | 1199             | 1197             | 1.211                       | 0.980 | 1.209  | 1.383  | 1.661  | 1.356  | 1.972  | 3.430  | 1.448  | 2.283  | 0.641 |
| 24  | cis-Carveol                                    | 1197-06-4  | C <sub>10</sub> H <sub>16</sub> O              | 19.52                 | 1217             | 1214             | 0.873                       | 0.329 | 0.626  | 0.614  | 0.741  | 0.494  | 0.765  | 0.459  | 0.735  | 0.484  | 0.359 |
| 25  | L-Carveol                                      | 99-48-9    | C <sub>10</sub> H <sub>16</sub> O              | 19.6                  | 1220             | 1220             | 0.379                       | 0.018 | 0.110  | 0.080  | 0.024  | nd     | 0.016  | 0.245  | nd     | nd     | nd    |
| 26  | Isogeraniol                                    | 5944-20-7  | C <sub>10</sub> H <sub>18</sub> O              | 19.75                 | 1226             | 1228             | 1.397                       | 0.291 | 0.654  | 0.772  | 0.493  | 0.504  | 1.016  | 0.704  | 1.245  | nd     | 0.426 |
| 27  | β-Citronellol                                  | 106-22-9   | C <sub>10</sub> H <sub>20</sub> O              | 19.85                 | 1229             | 1229             | 0.524                       | 0.164 | 0.030  | 1.098  | 0.340  | 0.239  | 0.261  | 0.782  | 0.333  | nd     | 0.195 |
| 28  | D-Carvone                                      | 2244-16-8  | C <sub>10</sub> H <sub>14</sub> O              | 20.14                 | 1240             | 1240             | 0.435                       | 0.238 | 0.460  | 0.378  | 0.364  | 0.349  | 0.491  | 0.435  | 0.345  | 0.438  | 0.164 |
| 29  | Piperitone                                     | 89-81-6    | C <sub>10</sub> H <sub>16</sub> O              | 20.48                 | 1252             | 1253             | 0.180                       | 0.114 | 0.137  | 0.096  | 0.071  | 0.181  | 0.067  | 0.138  | 0.063  | 0.203  | nd    |
| 30  | Perilla aldehyde                               | 2111-75-3  | C <sub>10</sub> H <sub>14</sub> O              | 21.00                 | 1271             | 1271             | 1.338                       | 1.017 | 1.873  | 1.522  | 1.544  | 1.728  | 1.526  | 1.583  | 1.319  | 1.805  | 0.664 |
| 31  | Thymol                                         | 89-83-8    | C <sub>10</sub> H <sub>14</sub> O              | 21.40                 | 1285             | 1283             | 0.583                       | 0.098 | 0.092  | 0.115  | 0.073  | 0.016  | 0.016  | 0.170  | 0.060  | nd     | 0.165 |
| 32  | Carvacrol                                      | 499-75-2   | C <sub>10</sub> H <sub>14</sub> O              | 21.57                 | 1291             | 1297             | 3.345                       | 0.650 | 3.806  | 1.636  | 0.753  | 0.537  | 0.690  | 9.240  | 0.936  | 0.104  | 1.556 |
| 33  | Methyl caprate                                 | 110-42-9   | C <sub>11</sub> H <sub>22</sub> O <sub>2</sub> | 22.31                 | 1319             | 1316             | 0.184                       | 0.122 | 0.429  | 0.167  | 0.133  | 0.128  | 0.220  | 0.468  | 0.491  | 0.131  | 0.204 |
| 34  | Methyl anthranilate                            | 134-20-3   | C <sub>8</sub> H <sub>9</sub> NO <sub>2</sub>  | 22.79                 | 1338             | 1332             | 0.155                       | 0.005 | 0.027  | 0.071  | nd     | 0.014  | nd     | nd     | 0.075  | nd     | nd    |
| 35  | Citronellol acetate                            | 150-84-5   | C <sub>12</sub> H <sub>22</sub> O <sub>2</sub> | 23.06                 | 1348             | 1348             | 0.233                       | 0.275 | 0.294  | 0.334  | 0.243  | 0.693  | 0.525  | 0.494  | 0.359  | 0.591  | 0.197 |
| 36  | α-Cubebene                                     | 17699-14-8 | C <sub>15</sub> H <sub>24</sub>                | 23.24                 | 1355             | 1354             | 0.176                       | 0.394 | 0.307  | 0.204  | 0.308  | 0.322  | 0.694  | 0.478  | 0.102  | 0.802  | 0.292 |
| 37  | Neryl acetate                                  | 141-12-8   | C <sub>12</sub> H <sub>20</sub> O <sub>2</sub> | 23.33                 | 1358             | 1356             | 0.356                       | 0.710 | 0.697  | 0.727  | 0.781  | 1.947  | 2.612  | 1.565  | 0.262  | 2.255  | 0.491 |
| 38  | Copaene                                        | 3856-25-5  | C <sub>15</sub> H <sub>24</sub>                | 23.97                 | 1383             | 1378             | 1.016                       | 1.600 | 1.511  | 0.904  | 1.272  | 1.532  | 2.623  | 2.387  | 0.459  | 3.797  | 0.977 |
| 39  | β-Cubebene                                     | 13744-15-5 | C <sub>15</sub> H <sub>24</sub>                | 24.31                 | 1396             | 1394             | 0.699                       | 4.951 | 2.311  | 1.229  | 1.556  | 2.432  | 3.701  | 3.344  | 0.725  | 9.178  | 2.073 |
| 40  | Benzoic acid, 2-(methylamino)-, methyl ester   | 85-91-6    | C <sub>9</sub> H <sub>11</sub> NO <sub>2</sub> | 24.55                 | 1406             | 1402             | 40.066                      | 5.184 | 28.840 | 19.674 | 17.169 | 11.435 | 12.395 | 9.195  | 27.093 | 6.574  | 7.031 |
| 41  | Caryophyllene                                  | 87-44-5    | C <sub>15</sub> H <sub>24</sub>                | 25.11                 | 1428             | 1427             | 3.411                       | 1.377 | 3.087  | 1.321  | 0.869  | 1.102  | 1.983  | 2.049  | 0.749  | 2.867  | 0.507 |
| 42  | (Z)-β-Farnesene                                | 28973-97-9 | C <sub>15</sub> H <sub>24</sub>                | 25.80                 | 1457             | 1458             | 0.095                       | 0.216 | 0.823  | 0.425  | 0.144  | 0.316  | 1.051  | 0.677  | 0.268  | 0.696  | 0.173 |
| 43  | Germacrene D                                   | 23986-74-5 | C <sub>15</sub> H <sub>24</sub>                | 26.60                 | 1489             | 1488             | 0.505                       | 4.142 | 2.308  | 1.410  | 1.165  | 2.200  | 3.425  | 5.788  | 0.772  | 7.269  | 1.736 |
| 44  | (3Z,6E)-α-Farnesene                            | 26560-14-5 | C <sub>15</sub> H <sub>24</sub>                | 26.76                 | 1496             | 1496             | 0.134                       | 0.919 | 0.189  | 0.138  | 0.061  | 0.262  | 0.314  | 0.304  | nd     | 1.812  | 0.570 |
| 45  | α-Farnesene                                    | 502-61-4   | C <sub>15</sub> H <sub>24</sub>                | 27.03                 | 1507             | 1503             | 11.411                      | 8.944 | 9.929  | 5.120  | 4.378  | 6.185  | 8.240  | 23.732 | 4.873  | 19.305 | 4.650 |

| No. | Compounds                       | CAS number | Molecular formula                              | RT <sup>a</sup> (min) | LRI <sup>b</sup> | LRI <sup>c</sup> | Relative areas <sup>d</sup> |       |       |       |       |       |       |       |       |       |       |
|-----|---------------------------------|------------|------------------------------------------------|-----------------------|------------------|------------------|-----------------------------|-------|-------|-------|-------|-------|-------|-------|-------|-------|-------|
|     |                                 |            |                                                |                       |                  |                  | GCP                         | CP1   | CP2   | CP3   | CP4   | CP5   | CP6   | CP7   | CP8   | CP9   | CP10  |
| 46  | δ-Guaiene                       | 3691-11-0  | C <sub>15</sub> H <sub>24</sub>                | 27.21                 | 1515             | 1512             | 0.114                       | 1.848 | 0.666 | 0.359 | 0.274 | 0.718 | 1.223 | 1.439 | 0.273 | 4.439 | 0.628 |
| 47  | Dodecanoic acid, methyl ester   | 111-82-0   | C <sub>13</sub> H <sub>26</sub> O <sub>2</sub> | 27.34                 | 1520             | 1520             | 0.140                       | 0.327 | 0.469 | 0.297 | 0.101 | 0.199 | 0.482 | 0.537 | 0.575 | 0.437 | 0.177 |
| 48  | Cadinene                        | 523-47-7   | C <sub>15</sub> H <sub>24</sub>                | 27.55                 | 1529             | 1529             | 1.713                       | 3.368 | 2.718 | 1.515 | 2.099 | 2.564 | 5.401 | 3.734 | 1.032 | 7.382 | 1.634 |
| 49  | Caryophyllene oxide             | 1139-30-6  | C <sub>15</sub> H <sub>24</sub> O              | 28.99                 | 1591             | 1596             | 0.142                       | 0.046 | 0.137 | 0.023 | 0.019 | 0.039 | 0.187 | 0.174 | 0.071 | 0.088 | 0.100 |
| 50  | α-Sinensal                      | 17909-77-2 | C <sub>15</sub> H <sub>22</sub> O              | 32.48                 | 1752             | 1752             | 0.828                       | nd    | 0.160 | 0.072 | 0.028 | 0.053 | 0.209 | nd    | 0.240 | nd    | nd    |
| 51  | Hexadecanoic acid, methyl ester | 112-39-0   | C <sub>17</sub> H <sub>34</sub> O <sub>2</sub> | 35.85                 | 1924             | 1924             | 0.085                       | nd    | 0.035 | 0.028 | 0.017 | nd    | 0.103 | 0.059 | 0.179 | nd    | nd    |

<sup>a</sup> Retention time (min). <sup>b</sup> Linear retention indices of the analyte. <sup>c</sup> Linear retention indices reported in the database. <sup>d</sup> Peak area ratios relative to n-tridecan (internal standard). nd, not detected. Nd, not detected.

GCP, *Citrus reticulata* 'Chachi' (n=31). CP1, *C. reticulata* 'Unshiu' (n=3). CP2, *C. reticulata* 'Zhuhong' (n=3). CP3, *C. reticulata* 'Ponkan' (n=5). CP4, *C. reticulata* 'Suavissima' (n=3). CP5, *C. reticulata* 'Tankan' (n=2). CP6, *C. reticulata* 'Hanggan' (n=2). CP7, *C. reticulata* 'Kinokuni' (n=2). CP8, *C. reticulata* 'Shiyue Ju' (n=1). CP9, *C. reticulata* 'Subcompressa' (n=1). CP10, *C. cavaleriei* H. Léveillé ex Cavalerie (n=1).

**Table S2.** Details of mature tangerine fruits of different species collected in this work.

| Sample No. | Scientific species name                                 | Classification | Place of collection         |
|------------|---------------------------------------------------------|----------------|-----------------------------|
| S1         | <i>Citrus reticulata</i> 'Unshiu'                       | CP             | Taizhou, Fujian             |
| S2         | <i>C. reticulata</i> 'Unshiu'                           | CP             | Taizhou, Fujian             |
| S3         | <i>C. reticulata</i> 'Unshiu'                           | CP             | Yichang, Hubei              |
| S4         | <i>C. reticulata</i> 'Zhuhong'                          | CP             | Ji'an, Jiangxi              |
| S5         | <i>C. reticulata</i> 'Zhuhong'                          | CP             | Ji'an, Jiangxi              |
| S6         | <i>C. reticulata</i> 'Zhuhong'                          | CP             | Chongqing                   |
| S7         | <i>C. reticulata</i> 'Ponkan'                           | CP             | Ji'an, Jiangxi              |
| S8         | <i>C. reticulata</i> 'Ponkan'                           | CP             | Chongqing                   |
| S9         | <i>C. reticulata</i> 'Ponkan'                           | CP             | Chongqing                   |
| S10        | <i>C. reticulata</i> 'Ponkan'                           | CP             | Quanzhou, Fujian            |
| S11        | <i>C. reticulata</i> 'Ponkan'                           | CP             | Quzhou, Zhejiang            |
| S12        | <i>C. reticulata</i> 'Suavissima'                       | CP             | Wenzhou, Zhejiang           |
| S13        | <i>C. reticulata</i> 'Suavissima'                       | CP             | Wenzhou, Zhejiang           |
| S14        | <i>C. reticulata</i> 'Suavissima'                       | CP             | Wenzhou, Zhejiang           |
| S15        | <i>C. reticulata</i> 'Tankan'                           | CP             | Chaozhou, Guangdong         |
| S16        | <i>C. reticulata</i> 'Tankan'                           | CP             | Chaozhou, Guangdong         |
| S17        | <i>C. reticulata</i> 'Hanggan'                          | CP             | Shaoguan, Guangdong         |
| S18        | <i>C. reticulata</i> 'Hanggan'                          | CP             | Shaoguan, Guangdong         |
| S19        | <i>C. reticulata</i> 'Kinokuni'                         | CP             | Guangxi                     |
| S20        | <i>C. reticulata</i> 'Kinokuni'                         | CP             | Fuzhou, Jiangxi             |
| S21        | <i>C. reticulata</i> 'Shiyue Ju'                        | CP             | Sihui, Guangdong            |
| S22        | <i>C. reticulata</i> 'Subcompressa'                     | CP             | Yongshun County,<br>Hu'nan  |
| S23        | <i>C. cavaleriei</i> H. Léveillé ex<br><i>Cavalerie</i> | CP             | Yichang, Hubei              |
| G1         | <i>C. reticulata</i> 'Chachi'                           | GCP            | Xinhui County,<br>Guangdong |
| G2         | <i>C. reticulata</i> 'Chachi'                           | GCP            | Xinhui County,<br>Guangdong |
| G3         | <i>C. reticulata</i> 'Chachi'                           | GCP            | Xinhui County,<br>Guangdong |
| G4         | <i>C. reticulata</i> 'Chachi'                           | GCP            | Xinhui County,<br>Guangdong |
| G5         | <i>C. reticulata</i> 'Chachi'                           | GCP            | Xinhui County,<br>Guangdong |
| G6         | <i>C. reticulata</i> 'Chachi'                           | GCP            | Xinhui County,<br>Guangdong |
| G7         | <i>C. reticulata</i> 'Chachi'                           | GCP            | Xinhui County,<br>Guangdong |
| G8         | <i>C. reticulata</i> 'Chachi'                           | GCP            | Xinhui County,<br>Guangdong |
| G9         | <i>C. reticulata</i> 'Chachi'                           | GCP            | Xinhui County,<br>Guangdong |
| G10        | <i>C. reticulata</i> 'Chachi'                           | GCP            | Xinhui County,<br>Guangdong |
| G11        | <i>C. reticulata</i> 'Chachi'                           | GCP            | Xinhui County,<br>Guangdong |
| G12        | <i>C. reticulata</i> 'Chachi'                           | GCP            | Xinhui County,<br>Guangdong |

---

|     |                               |     |                             |
|-----|-------------------------------|-----|-----------------------------|
| G13 | <i>C. reticulata</i> 'Chachi' | GCP | Xinhui County,<br>Guangdong |
| G14 | <i>C. reticulata</i> 'Chachi' | GCP | Xinhui County,<br>Guangdong |
| G15 | <i>C. reticulata</i> 'Chachi' | GCP | Xinhui County,<br>Guangdong |
| G16 | <i>C. reticulata</i> 'Chachi' | GCP | Xinhui County,<br>Guangdong |
| G17 | <i>C. reticulata</i> 'Chachi' | GCP | Xinhui County,<br>Guangdong |
| G18 | <i>C. reticulata</i> 'Chachi' | GCP | Xinhui County,<br>Guangdong |
| G19 | <i>C. reticulata</i> 'Chachi' | GCP | Xinhui County,<br>Guangdong |
| G20 | <i>C. reticulata</i> 'Chachi' | GCP | Xinhui County,<br>Guangdong |
| G21 | <i>C. reticulata</i> 'Chachi' | GCP | Xinhui County,<br>Guangdong |
| G22 | <i>C. reticulata</i> 'Chachi' | GCP | Xinhui County,<br>Guangdong |
| G23 | <i>C. reticulata</i> 'Chachi' | GCP | Xinhui County,<br>Guangdong |
| G24 | <i>C. reticulata</i> 'Chachi' | GCP | Xinhui County,<br>Guangdong |
| G25 | <i>C. reticulata</i> 'Chachi' | GCP | Xinhui County,<br>Guangdong |
| G26 | <i>C. reticulata</i> 'Chachi' | GCP | Xinhui County,<br>Guangdong |
| G27 | <i>C. reticulata</i> 'Chachi' | GCP | Xinhui County,<br>Guangdong |
| G28 | <i>C. reticulata</i> 'Chachi' | GCP | Xinhui County,<br>Guangdong |
| G29 | <i>C. reticulata</i> 'Chachi' | GCP | Xinhui County,<br>Guangdong |
| G30 | <i>C. reticulata</i> 'Chachi' | GCP | Xinhui County,<br>Guangdong |
| G31 | <i>C. reticulata</i> 'Chachi' | GCP | Xinhui County,<br>Guangdong |

---
